# Supplementary material for: An ultra-sensitive colorimetric assay for reliable visual detection of telomerase activity
Source: Royal Society of Chemistry journal article supplement (doi:10.1039/c7an00950j), 2017-01-01
Supplement: c7an00950j1.pdf [file c7an00950j1.pdf]

## **Supporting Information**

### **An ultra-sensitive colorimetric assay for reliably visual detection of telomerase activity**

Yaocai Wang, Luzhu Yang, Yanjun Wang, Wei Liu, Baoxin Li and Yan Jin\*

Key Laboratory of Applied Surface and Colloid Chemistry, Ministry of Education,  
Key Laboratory of Analytical Chemistry for Life Science of Shaanxi Province, School  
of Chemistry and Chemical Engineering, Shaanxi Normal University, Xi'an 710062,  
China

\* Corresponding author: Prof. Yan Jin, Key Laboratory of Applied Surface and  
Colloid Chemistry, Ministry of Education, Key Laboratory of Analytical Chemistry  
for Life Science of Shaanxi Province, School of Chemistry and Chemical  
Engineering, Shaanxi Normal University

Email: [jinyan@snnu.edu.cn](mailto:jinyan@snnu.edu.cn), Fax: 86-29-81530727, Tel: 86-29-81530726

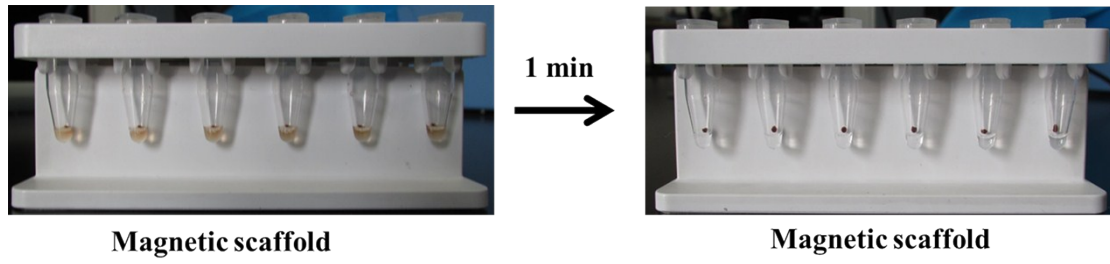

Figure S1. Protocol of magnetic separation.

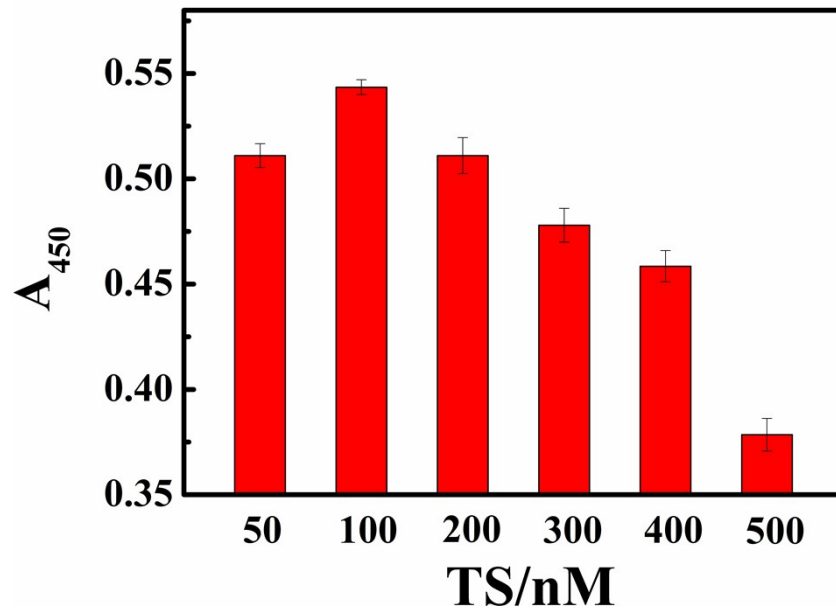

Figure S2. Impact of TS concentration on the absorbance. Telomerase corresponding to 200 HeLa cells was used. Error bars were calculated from three replicate measurements.

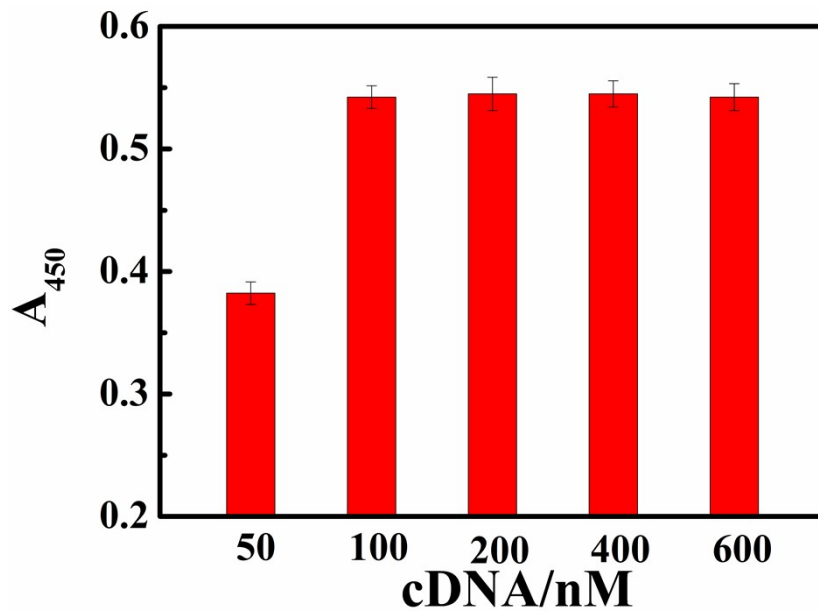

Figure S3. Impact of cDNA concentration on the absorbance. **Telomerase corresponding to 200 HeLa cells was used.** Error bars were calculated from three replicate measurements.

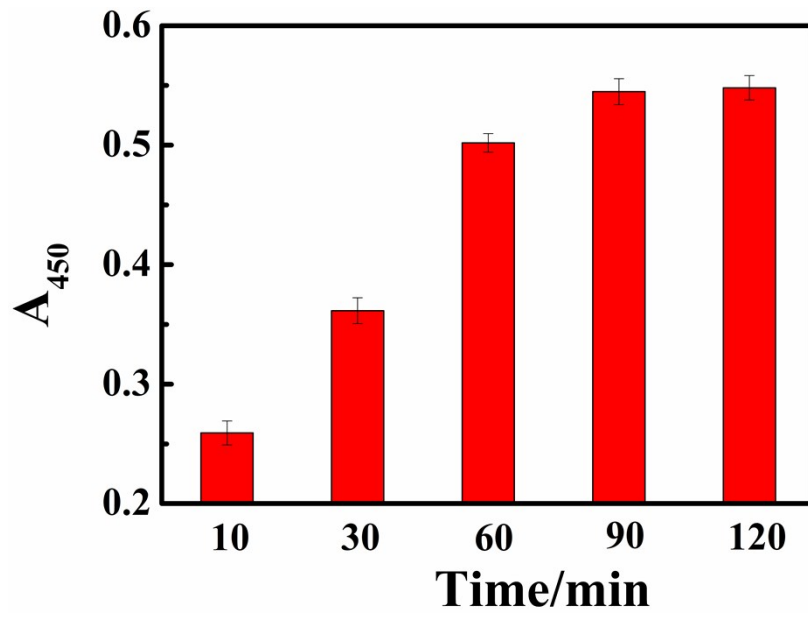

Figure S4. Impact of hybridization time on the absorbance. **Telomerase corresponding to 200 HeLa cells was used.** Error bars were calculated from three replicate measurements.

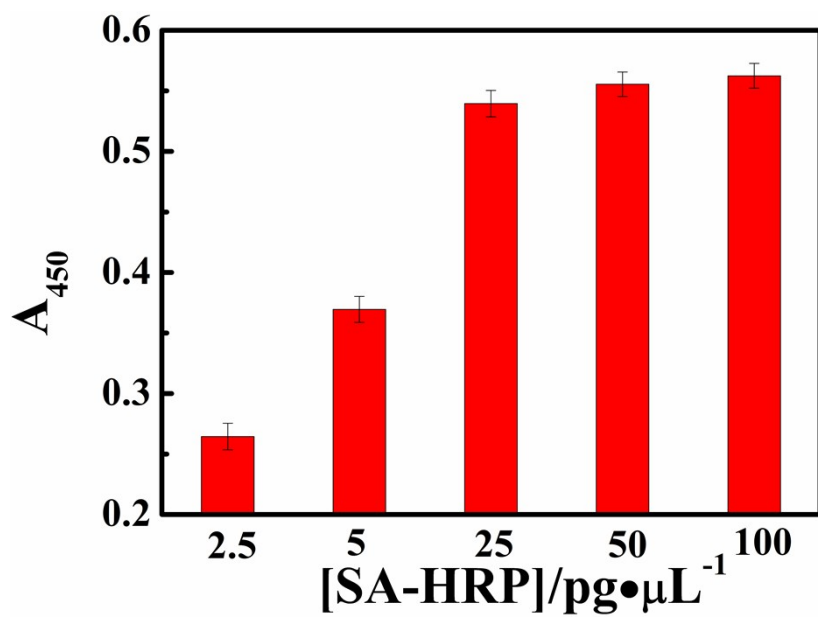

Figure S5. Impact of SA-HRP concentration on the absorbance. **Telomerase corresponding to 200 HeLa cells was used.** Error bars were calculated from three replicate measurements.

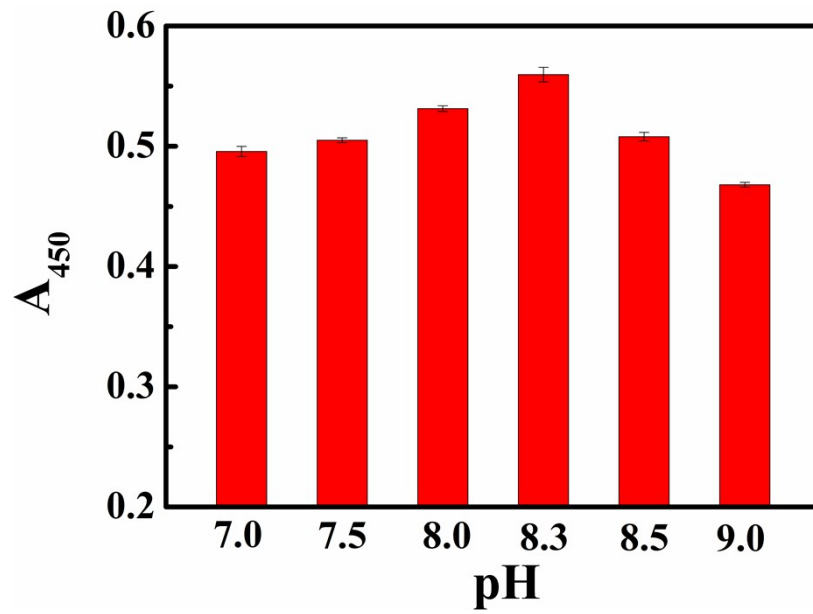

Figure S6. Impact of pH of TRAP buffer on the absorbance. **Telomerase corresponding to 200 HeLa cells was used.** Error bars were calculated from three replicate measurements.

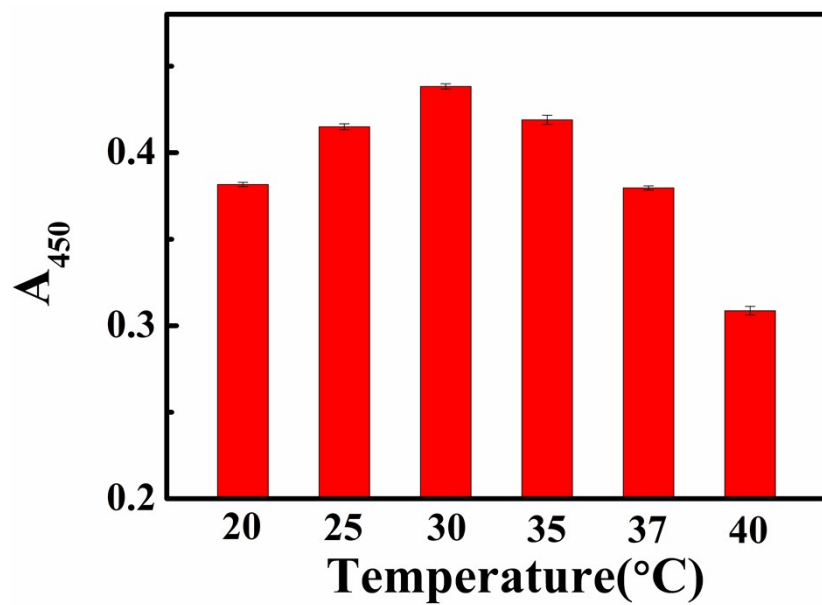

Figure S7. Impact of extension temperature on the absorbance. **Telomerase corresponding to 200 HeLa cells was used.** Error bars were calculated from three replicate measurements.



**Table S1.** Comparison of colorimetric assays for detecting telomerase activity

| Reference | Signal reporter | Detection limit (naked eye) | Detection limit (UV-vis spectrometer) | Detection in complex matrix | Visual detection |
|-----------|-----------------|-----------------------------|---------------------------------------|-----------------------------|------------------|
| (1)       | AuNP            | 10 HeLa cells/ $\mu$ L      | 1 HeLa cell/ $\mu$ L                  | No                          | Yes              |
| (2)       | AuNP            | 1000 HeLa cells             | 100 HeLa cells                        | No                          | Yes              |
| (3)       | AuNP            | 6 MCF-7 cells/ $\mu$ L      | Not mentioned                         | No                          | Yes              |
| (4)       | AuNP            | 100 HL-60 cells/mL          | 29 HL-60 cells/mL                     | No                          | Yes              |
| (5)       | AuNP            | 100 HeLa cells              | 10 HeLa cells                         | No                          | Yes              |
| (6)       | AuNP            | 27 293T cells/ $\mu$ L      | 27 293T cells/ $\mu$ L                | No                          | Yes              |
| (7)       | AuNP            | 100 cells/mL                | 10 cells/mL                           | No                          | Yes              |
| (8)       | ABTS            | Not mentioned               | ~ 500 HeLa cells                      | No                          | No               |
| (9)       | TMB             | Not mentioned               | ~ 200 293T cells/ $\mu$ L             | No                          | No               |
| (10)      | ABTS            | Not mentioned               | 200 HeLa cells                        | No                          | No               |
| (11)      | TMB             | 100 HeLa cells/mL           | 60 HeLa cells/mL                      | No                          | Yes              |
| This work | TMB             | 5 HeLa cells                | 1 HeLa cell                           | Yes                         | Yes              |

## References

- (1) Wang, J. S.; Wu, L.; Ren, J. S.; Qu, X. G. Visualizing Human Telomerase Activity with Primer-Modified Au Nanoparticles. *Small* **2012**, *8*, 259-264.

- (2) Wang, J. S.; Wu, L.; Ren, J. S.; Qu, X. G. Visual Detection of Telomerase activity with a Tunable Dynamic Range by Using a Gold Nanoparticle Probe-based Hybridization Protection Strategy. *Nanoscale* **2014**, *6*, 1661-1666.
- (3) Duan, R. X.; Wang, B. Y.; Zhang, T. C.; Zhang, Z. Y.; Xu, S. F.; Chen, Z. F.; Lou, X. D.; Xia, F. Sensitive and Bidirectional Detection of Urine Telomerase Based on the Four Detection-Color States of Difunctional Gold Nanoparticle Probe. *Anal. Chem.* **2014**, *86*, 9781-9785.
- (4) Zhang, L.; Zhang, S. J.; Pan, W.; Liang, Q. C.; Song, X. Y. Exonuclease I Manipulating Primer-modified Gold Nanoparticles for Colorimetric Telomerase Activity Assay. *Biosens. Bioelectron.* **2016**, *77*, 144-148.
- (5) Xu, X.W.; Wang, L.; Huang, Y.Q.; Gao, W.S.; Li, K.; Jiang, W. Model-Guided Interface Probe Arrangement for Sensitive Protein Detection. *Anal. Chem.* **2016**, *88*, 9885-9889.
- (6) Sharon, E.; Golub, E.; Niazov-Elkan, A.; Balogh, D.; Willner, I. Analysis of Telomerase by the Telomeric Hemin/G-Quadruplex Controlled Aggregation of Au Nanoparticles in the Presence of Cysteine. *Anal. Chem.* **2014**, *86*, 3153-3158.
- (7) Zong, S. F.; Wang, Z. Y.; Chen, H.; Hu, G. H.; Liu, M.; Chen, P.; Cui, Y. P. Colorimetry and SERS Dual-mode Detection of Telomerase Activity: Combining Rapid Screening with High Sensitivity. *Nanoscale* **2014**, *6*, 1808-1816.

- (8) Xiao, Y.; Pavlov, V.; Niazov, T.; Dishon, A.; Kotler, M.; Willner, I. Catalytic Beacons for the Detection of DNA and Telomerase Activity. *J. Am. Chem. Soc.* **2004**, *126*, 7430-7431.
- (9) Freeman, R.; Sharon, E.; Teller, C.; Henning, A.; Tzfati, Y.; Willner, I. DNAzyme-Like Activity of Hemin-Telomeric G-Quadruplexes for the Optical Analysis of Telomerase and its Inhibitors. *ChemBioChem* **2010**, *11*, 2362-2367.
- (10) Li, H.; Fu, H. W.; Zhao, T.; Kong, D. M. Simple, PCR-free Telomerase Activity Detection using G-quadruplex-hemin DNAzyme. *RSC Adv.* **2014**, *5*, 6475-6480.
- (11) Xu, X. L.; Wei, M.; Liu, Y. J.; Liu, X.; Wei, W.; Zhang, Y. J.; Liu, S. Q. A Simple, Fast, Label-free Colorimetric Method for Detection of Telomerase Activity in Urine by Using Hemin-graphene Conjugates. *Biosens. Bioelectron.* **2017**, *87*, 600-606.
